# Supplementary material
Source: PubMed Central journal article supplement (PMC3000275)
Supplement: 1010460107_pnas.201010460SI.pdf [file 1010460107_pnas.201010460SI.pdf]

# Supporting Information

Azadi et al. 10.1073/pnas.1010460107

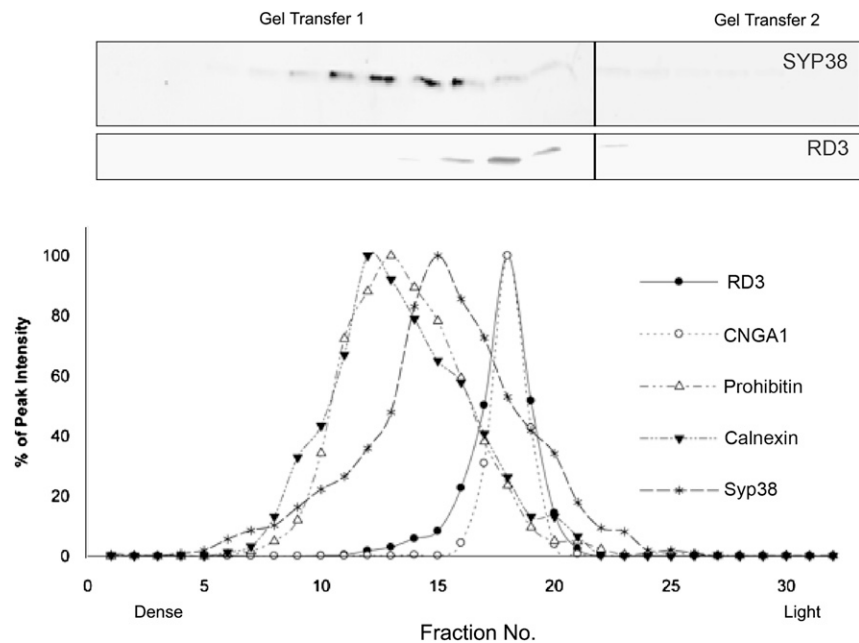

**Fig. S1.** Localization of RD3 to photoreceptor outer segments by subfractionation. A mouse retinal homogenate was subfractionated by equilibrium density centrifugation on a 20–60% sucrose gradient. The amount of protein in the fractions was quantified on western blots labeled with antibodies to various subcellular markers. Due to the large number of fractions, two gel transfers were used as indicated. Subcellular markers (antibodies): RD3 (Rd3 9D12 antibody); rod outer segment CNGA1 (PMc 2G11); mitochondria (prohibitin), endoplasmic reticulum (calnexin), synaptic vesicles (SYP 38). RD3 cosedimented with the rod outer segment marker CNGA1. Western blots labeled for synaptophysin (SYP38) and RD3 are shown on top.

| Gene         | Relative Intensity (approx.) |
|--------------|------------------------------|
| ABCA4        | 0.66                         |
| CNGA1        | 0.40                         |
| GC2          | 0.28                         |
| PDE $\alpha$ | 0.74                         |

2 of 3

**Table S1. Mass spectrometry of bound proteins from the anti-Rd3 immunoprecipitation experiment**

| Accession no./gene | Protein                               | Mass    | Mascot score | No. of peptides |
|--------------------|---------------------------------------|---------|--------------|-----------------|
| P52785/GUC2E_MOUSE | Retinal guanylyl cyclase 1 (GC-E)     | 121,675 | 2,397        | 89              |
| Q62261/SPTB2_MOUSE | Spectrin beta chain, brain 1          | 274,908 | 1,080        | 32              |
| P99024/TBB5_MOUSE  | Tubulin beta-5 chain                  | 50,095  | 989          | 31              |
| P16546/SPTA2_MOUSE | Spectrin alpha chain, brain           | 285,221 | 964          | 34              |
| P05213/TBA1B_MOUSE | Tubulin alpha-1B chain                | 50,804  | 798          | 19              |
| P56480/ATPB_MOUSE  | ATP synthase subunit beta             | 56,265  | 594          | 12              |
| P63017/HSP7C_MOUSE | Heat-shock cognate 71 kDa protein     | 56,265  | 528          | 19              |
| Q68FD5/CLH_MOUSE   | Clathrin heavy chain 1                | 193,202 | 504          | 22              |
| Q55DA5/GUC2F_MOUSE | Retinal guanylyl cyclase 2 (GC-F)     | 125,315 | 458          | 22              |
| P48962/ADT1_MOUSE  | ADP/ATP translocase 1                 | 33,111  | 442          | 20              |
| Q6PIC6/AT1A3_MOUSE | Na/K ATPase subunit alpha-3           | 113,045 | 427          | 18              |
| P46096/SYT1_MOUSE  | Synaptotagmin-1                       | 47,730  | 421          | 17              |
| Q03265/ATPA_MOUSE  | ATP synthase subunit alpha            | 59,830  | 398          | 14              |
| P60710/ACTB_MOUSE  | Actin, cytoplasmic 1                  | 42,052  | 391          | 16              |
| P17182/ENOA_MOUSE  | Alpha-enolase                         | 47,453  | 379          | 13              |
| P20443/ARR5_MOUSE  | S-arrestin                            | 45130   | 376          | 15              |
| P51881/ADT2_MOUSE  | ADP/ATP translocase 2                 | 33,138  | 365          | 17              |
| Q8VDN2/AT1A1_MOUSE | Na/K ATPase subunit alpha-1           | 114,221 | 363          | 10              |
| P15409/OPSD_MOUSE  | Rhodopsin                             | 39,572  | 328          | 8               |
| P20612/GNAT1_MOUSE | Transducin G(t) subunit alpha-1       | 40,397  | 317          | 7               |
| Q8BH59/CMC1_MOUSE  | Ca-binding mitochondrial protein      | 74,922  | 297          | 10              |
| P20029/GRP78_MOUSE | 78 kDa glucose-regulated protein      | 72,492  | 279          | 11              |
| P15105/GLNA_MOUSE  | Glutamine synthetase                  | 42,834  | 270          | 11              |
| O70318/E41L2_MOUSE | Band 4.1-like protein                 | 110,280 | 265          | 14              |
| Q7TPR4/ACTN1_MOUSE | Alpha-actinin-1                       | 103,631 | 259          | 11              |
| P46460/NSF_MOUSE   | Vesicle-fusing ATPase                 | 83,131  | 248          | 9               |
| Q8CJ40/CROCC_MOUSE | Rootletin                             | 227,349 | 234          | 11              |
| Q8BMK4/CKAP4_MOUSE | Cytoskeleton-associated protein 4     | 63,711  | 222          | 8               |
| P16858/G3P_MOUSE   | G-3-P-dehydrogenase                   | 36,072  | 190          | 8               |
| P27664/PDE6A_MOUSE | Rod phosphodiesterase subunit alpha   | 100,437 | 190          | 7               |
| Q61595/KTN1_MOUSE  | Kinectin                              | 153,068 | 186          | 6               |
| Q91VR2/ATPG_MOUSE  | ATP synthase subunit gamma            | 32,979  | 170          | 8               |
| Q01853/TERA_MOUSE  | Transitional ER ATPase                | 89,950  | 157          | 7               |
| Q9D6R2/IDH3A_MOUSE | Isocitrate dehydrogenase [NAD]        | 40,069  | 152          | 6               |
| P27546/MAP4_MOUSE  | Microtubule-associated protein 4      | 117,927 | 142          | 5               |
| P27546/MAP4_MOUSE  | Microtubule-associated protein 4      | 117,927 | 142          | 5               |
| Q07797/LG3BP_MOUSE | Galectin-3-binding protein            | 65,362  | 125          | 7               |
| P15499/PRPH2_MOUSE | Peripherin-2                          | 39,975  | 123          | 5               |
| P29974/CNGA1_MOUSE | cGMP-gated cation channel alpha-1     | 79,809  | 116          | 6               |
| P62874/GBB1_MOUSE  | Transducin subunit beta-1             | 38,151  | 105          | 6               |
| P20152/VIME_MOUSE  | Vimentin                              | 53,712  | 101          | 5               |
| O35129/PHB2_MOUSE  | Prohibitin-2                          | 33,276  | 100          | 4               |
| P10126/EF1A1_MOUSE | Elongation factor 1-alpha 1           | 50,424  | 94           | 5               |
| O08553/DPYL2_MOUSE | Dihydropyrimidinase-related protein 2 | 62,638  | 94           | 4               |
| Q8CAQ8/IMMT_MOUSE  | Mitochondrial inner membrane protein  | 84,247  | 92           | 6               |
| Q8BRE0/RD3_MOUSE   | Protein RD3                           | 22,826  | 91           | 4               |
| Q92511/ATAD3_MOUSE | ATPase family AAA                     | 66,872  | 90           | 4               |
| P38647/GRP75_MOUSE | Stress-70 protein                     | 73,768  | 87           | 5               |

A detergent-solubilized mouse retinal membrane extract was applied to a Rd3-9D12 immunoaffinity matrix. After unbound protein was removed, the bound protein was eluted with SDS and digested with trypsin for analysis of peptides by LC/MS-MS. Data were searched using a Mascot server. Keratin, a common contaminant, and mouse Ig also were present as contaminating proteins, but are not included here. The table includes proteins identified from four or more peptides.
